# Supplementary material
Source: publisher figshare collection journal article supplement (https://tandf.figshare.com/articles/dataset/_/21806102)
Supplement: Supplementary file 1 [file 2]

## Supplement 3. Tables

Table 1. Demographic variables

### Practice setting (N = 136)

|                            | Frequency (N), percent (%) |
|----------------------------|----------------------------|
| Academic-community         | 14 (10.3)                  |
| Academic-private           | 5 (3.7)                    |
| Community-private          | 16 (11.8)                  |
| Academic-community-private | 2 (1.5)                    |

Combination (N = 37)

Table 2. Type of corticosteroid and local anesthetics

### Type of corticosteroid for needle injection (N = 136)

|                      | Frequency (N), percent (%) |
|----------------------|----------------------------|
| Methylprednisolone   | 2 (1.5)                    |
| TAC 40/verapamil 1:1 | 1 (0.7)                    |

Other (N = 3)

### Local anesthesia (N = 128)

|                                         | Frequency (N), percent (%) |
|-----------------------------------------|----------------------------|
| Anesthetic cream + no                   | 3 (2.3)                    |
| Simultaneously + no                     | 2 (1.6)                    |
| Injected before + simultaneously        | 1 (0.8)                    |
| Anesthetic cream + simultaneously       | 1 (0.8)                    |
| Anesthetic cream + injected before + no | 1 (0.8)                    |

Combination (N = 8)

Table 3. Dosing, treatment sessions, treatment interval

**Small keloid, volume (N = 128)**

|                                    | Frequency (N), percent (%) |
|------------------------------------|----------------------------|
| Erroneous answer/misinterpretation | 13 (10.2)                  |
| Unknown                            | 1 (0.8)                    |
| Unclear                            | 4 (3.1)                    |

Other (N = 18)

**Multiple keloids, volume (N = 128)**

|                                    | Frequency (N), percent (%) |
|------------------------------------|----------------------------|
| Erroneous answer/misinterpretation | 11 (8.6)                   |
| Unknown                            | 5 (3.9)                    |
| Unclear                            | 1 (0.8)                    |

Other (N = 17)

**Small keloid, concentration (N = 128)**

|                                    | Frequency (N), percent (%) |
|------------------------------------|----------------------------|
| 1 mg/mL                            | 3 (2.3)                    |
| Erroneous answer/misinterpretation | 4 (3.1)                    |
| Unknown                            | 2 (1.6)                    |

Other (N = 9)

**Multiple keloids, concentration (N = 128)**

|                                    | Frequency (N), percent (%) |
|------------------------------------|----------------------------|
| 1 mg/mL                            | 1 (0.8)                    |
| Erroneous answer/misinterpretation | 5 (3.9)                    |
| Unknown                            | 2 (1.6)                    |
| Unclear                            | 2 (1.6)                    |

Other (N = 10)

**Small keloid, treatment sessions (N = 128)**

|                                 | Frequency (N), percent (%) |
|---------------------------------|----------------------------|
| Other treatment                 | 2 (1.6)                    |
| 3, sometimes more               | 1 (0.8)                    |
| Depending on reaction of keloid | 1 (0.8)                    |

Other (N = 4)

**Multiple keloids, treatment sessions (N = 128)**

|                                                   | Frequency (N), percent (%) |
|---------------------------------------------------|----------------------------|
| Try one lesion first with intralesional injection | 1 (0.8)                    |

|                                |         |
|--------------------------------|---------|
| I always combine the therapies | 1 (0.8) |
|--------------------------------|---------|

Other (N = 2)

#### Treatment interval (N = 128)

|                 | Frequency (N), percent (%) |
|-----------------|----------------------------|
| 1-2-3(-4) weeks | 3 (2.3)                    |

Other (N = 3)

Table 4. Syringe and needle size

#### Syringe size (N = 128)

|                   | Frequency (N), percent (%) |
|-------------------|----------------------------|
| Smallest possible | 1 (0.8)                    |
| Dermojet          | 1 (0.8)                    |

Other (N = 2)

#### Needle size (N = 128)

|                                                                           | Frequency (N), percent (%) |
|---------------------------------------------------------------------------|----------------------------|
| Smallest possible                                                         | 1 (0.8)                    |
| Insulin needle                                                            | 1 (0.8)                    |
| Dermojet                                                                  | 1 (0.8)                    |
| 0.18 mm                                                                   | 2 (1.6)                    |
| 31 Gauge (White)                                                          | 2 (1.6)                    |
| 31 Gauge or 27 Gauge                                                      | 1 (0.8)                    |
| Size depends on location of keloid                                        | 1 (0.8)                    |
| I use blue or green needles but apparently from a different type (colour) | 1 (0.8)                    |

Other (N = 10)

Table 5. Needle placement, infiltration, endpoint, level of injection and subcutaneous tissue loss

#### Factor(s) considered important for corticosteroid injection (N = 128)

|                                                  | Frequency (N), percent (%) |
|--------------------------------------------------|----------------------------|
| First put the needle in, than retract and inject | 1 (0.8)                    |
| Compression                                      | 1 (0.8)                    |
| Saturation                                       | 1 (0.8)                    |
| Depth                                            | 2 (1.6)                    |

Other (N = 5)

#### Level of injection (N = 128)

|  | Frequency (N), percent (%) |
|--|----------------------------|
|--|----------------------------|

|                                                                                             |         |
|---------------------------------------------------------------------------------------------|---------|
| Subepidermal + I do not pay particular attention to the height of the keloid where I inject | 1 (0.8) |
| Subepidermal + In the center of the keloid + Below the center of the keloid                 | 1 (0.8) |
| Unanswered                                                                                  | 3 (2.3) |

Other (N = 5)

**Factor(s) for preventing subcutaneous tissue loss (N = 128)**

|                                       | Frequency (N), percent (%) |
|---------------------------------------|----------------------------|
| Minimum of 6 weeks between injections | 1 (0.8)                    |
| Long interval after first session     | 1 (0.8)                    |
| Time between injections               | 1 (0.8)                    |
| Patient education                     | 1 (0.8)                    |

Other (N = 4)
